# Supplementary material for: Introduction of 1D rGO nanoribbons as spacers between 2D MXenes for a high-performance electrode for supercapacitors
Source: Royal Society of Chemistry journal article supplement (doi:10.1039/d4dt02127d), 2024-01-01
Supplement: d4dt02127d1.pdf [file d4dt02127d1.pdf]

## Introduce 1D rGO nanoribbons as spacers between 2D MXene for high performance electrode of supercapacitor

Xiaolong Lu<sup>a</sup>, Yan Zhou<sup>a</sup>, Cancan Li<sup>a</sup>, Qi Wang<sup>a</sup>, Bijun Fang<sup>a</sup>, Yi Shi<sup>a</sup>, Ningyi Yuan<sup>a</sup>, Jianning Ding<sup>a,b</sup>

### Supporting Information

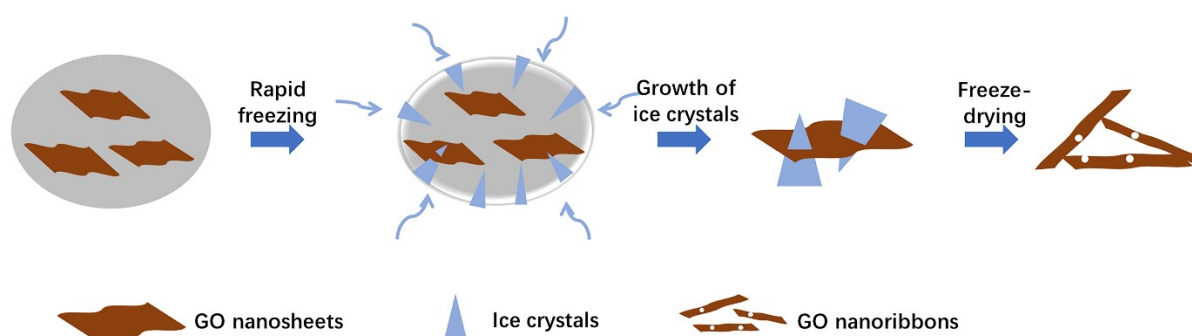

**Fig. S1** Illustration of the protocol for preparing GO nanoribbons.

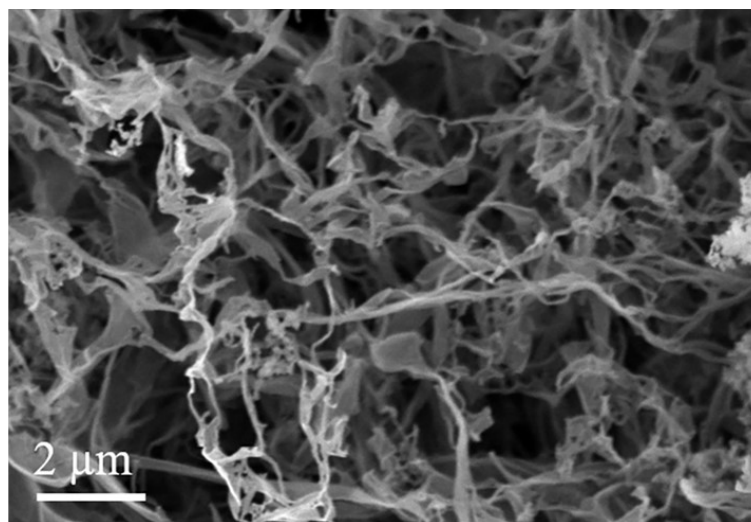

**Fig. S2** SEM image of GO nanoribbons.

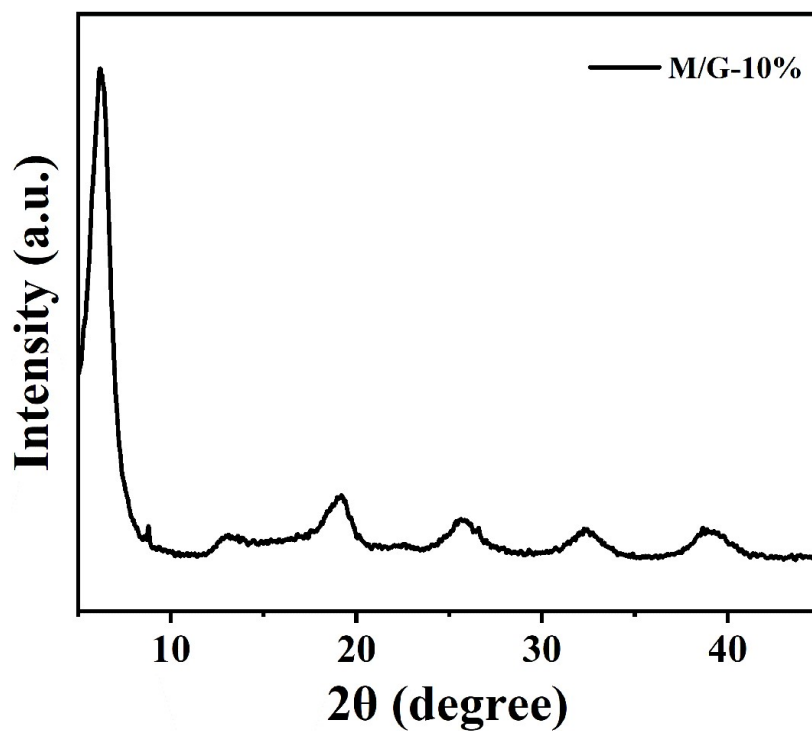

**Fig. S3** XRD pattern of M/G-10 wt% film.

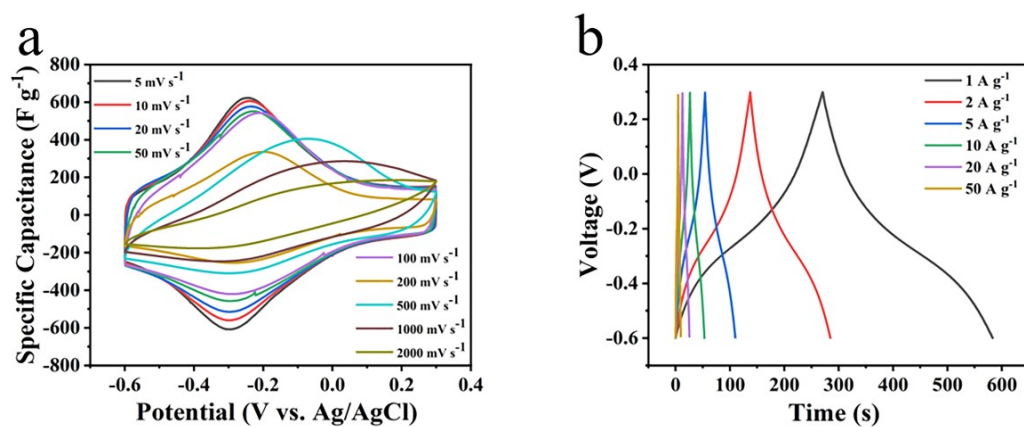

**Fig. S4** (a) CV curves of pure MXene film electrode at different scan rates, (b) GCD curves at different current densities.

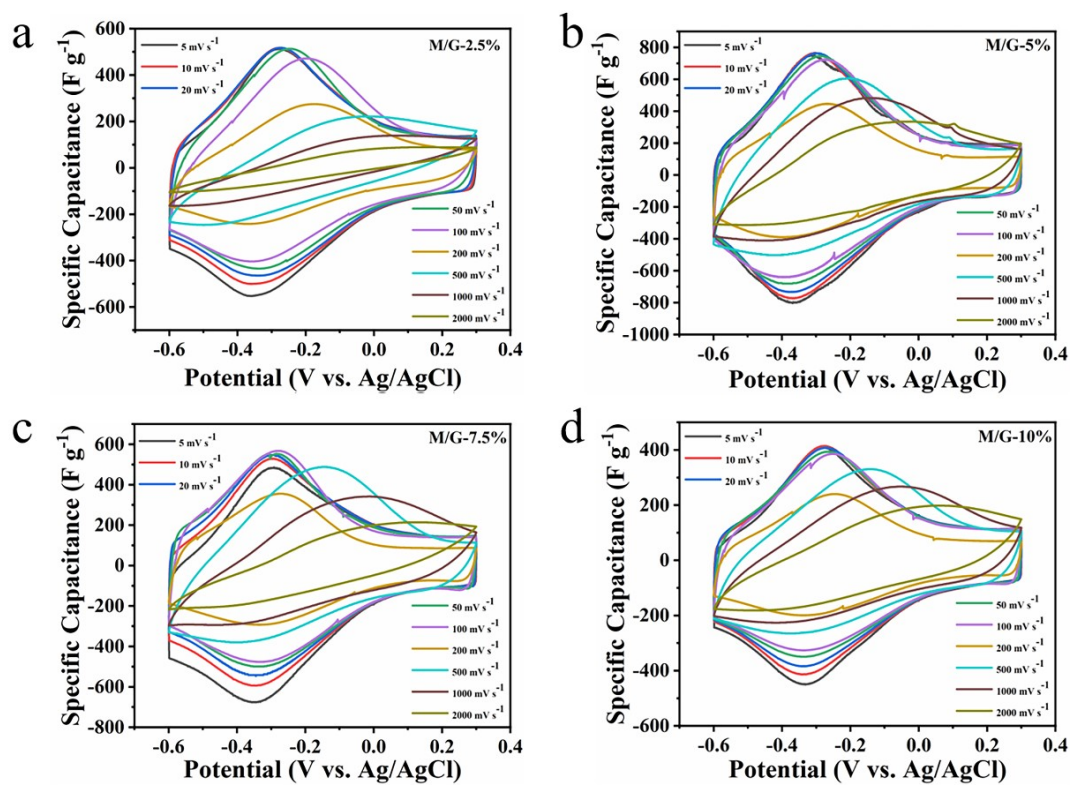

**Fig. S5** CV curves of M/G (with the mass ratio of GO ranges from 2.5% to 10%) electrodes at different scan rates from 5 to 2000  $\text{mV s}^{-1}$ .

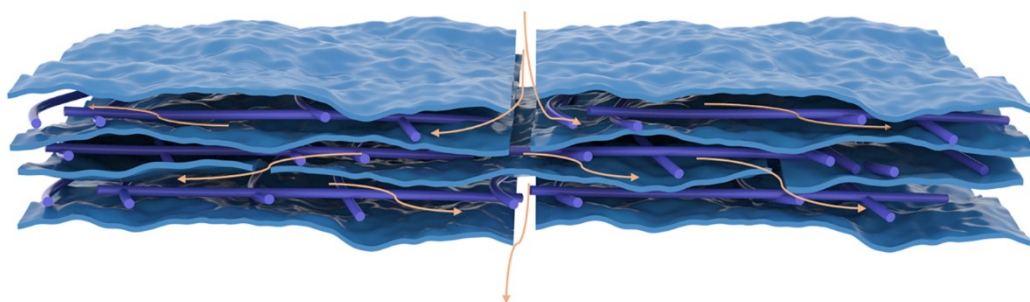

**Fig. S6** Schematic diagram of ion transport mechanism in M/G hybrid film.

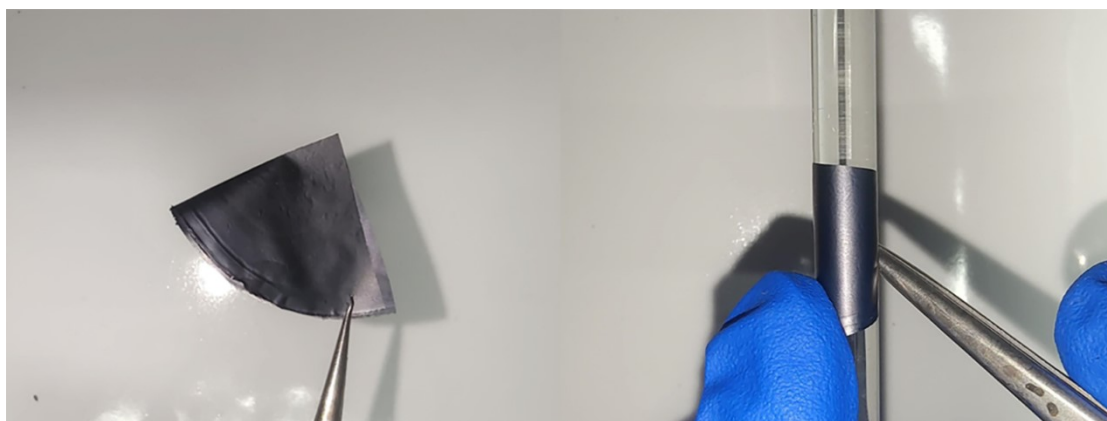

**Fig. S7** Photographs of a representative as-prepared M/G-5% hybrid film.
